# Supplementary material
Source: PubMed Central journal article supplement (PMC3685256)
Supplement: AEM.03530-12_zam999104370so1.pdf [file AEM.03530-12_zam999104370so1.pdf]

TABLE S1. Host spectrum of phage KHP30 among *H. pylori* strains.

| <i>H. pylori</i> strain | Sensitivity to phage KHP30 <sup>a</sup> | Description of <i>H. pylori</i> strain | Reference  | Typing by RFLP <sup>b</sup> |               |
|-------------------------|-----------------------------------------|----------------------------------------|------------|-----------------------------|---------------|
|                         |                                         |                                        |            | UreAB PCR/HaeIII            | FlaA PCR/HhaI |
| KMT7                    | -                                       | Isolated at Kochi, Japan               | This study | A                           | 1             |
| KMT9                    | +                                       | Isolated at Kochi, Japan               | This study | B                           | 2             |
| KMT15                   | -                                       | Isolated at Kochi, Japan               | This study | C                           | 3             |
| KMT16                   | -                                       | Isolated at Kochi, Japan               | This study | C                           | 3             |
| KMT17                   | -                                       | Isolated at Kochi, Japan               | This study | D                           | 2             |
| KMT18                   | +                                       | Isolated at Kochi, Japan               | This study | E                           | 3             |
| KMT19                   | -                                       | Isolated at Kochi, Japan               | This study | D                           | 2             |
| KMT28                   | -                                       | Isolated at Kochi, Japan               | This study | F                           | 1             |
| KMT84                   | +                                       | Isolated at Kochi, Japan               | This study | C                           | 2             |
| KMT85                   | +                                       | Isolated at Kochi, Japan               | This study | I                           | 3             |
| KMT86                   | +                                       | Isolated at Kochi, Japan               | This study | C                           | 2             |
| KMT87                   | +                                       | Isolated at Kochi, Japan               | This study | C                           | 1             |
| KMT88                   | -                                       | Isolated at Kochi, Japan               | This study | J                           | 6             |
| KMT89                   | +                                       | Isolated at Kochi, Japan               | This study | D                           | 3             |
| KMT90                   | -                                       | Isolated at Kochi, Japan               | This study | K                           | 7             |
| KMT114                  | +                                       | Isolated at Kochi, Japan               | This study | L                           | 3             |
| KMT117                  | -                                       | Isolated at Kochi, Japan               | This study | G                           | 1             |
| KMT124                  | -                                       | Isolated at Kochi, Japan               | This study | F                           | 1             |
| KMT126                  | +                                       | Isolated at Kochi, Japan               | This study | L                           | 2             |
| KMT130                  | +                                       | Isolated at Kochi, Japan               | This study | K                           | 3             |
| NY1                     | -                                       | Isolated at Yamaguchi, Japan           | This study | L                           | 5             |
| NY2                     | +                                       | Isolated in Yamaguchi, Japan           | This study | M                           | 1             |
| NY3                     | +                                       | Isolated in Yamaguchi, Japan           | This study | C                           | 6             |
| NY4                     | +                                       | Isolated in Yamaguchi, Japan           | This study | C                           | 6             |
| NY5                     | +                                       | Isolated in Yamaguchi, Japan           | This study | N                           | 2             |
| NY6                     | +                                       | Isolated in Yamaguchi, Japan           | This study | N                           | 2             |
| NY9                     | +                                       | Isolated in Yamaguchi, Japan           | This study | H                           | 2             |
| NY10                    | -                                       | Isolated in Yamaguchi, Japan           | This study | D                           | 7             |
| NY11                    | +                                       | Isolated in Yamaguchi, Japan           | This study | O                           | 8             |
| NY12                    | +                                       | Isolated in Yamaguchi, Japan           | This study | O                           | 8             |
| NY23                    | +                                       | Isolated in Yamaguchi, Japan           | This study | H                           | 5             |
| NY24                    | -                                       | Isolated in Yamaguchi, Japan           | This study | J                           | 2             |
| NY31                    | -                                       | Isolated in Yamaguchi, Japan           | This study | D                           | 5             |
| NY37                    | +                                       | Isolated in Yamaguchi, Japan           | This study | G                           | 4             |
| NY38                    | +                                       | Isolated in Yamaguchi, Japan           | This study | H                           | 5             |
| NY43                    | -                                       | Isolated in Yamaguchi, Japan           | This study | P                           | 7             |
| NY44                    | +                                       | Isolated in Yamaguchi, Japan           | This study | P                           | 7             |
| NY50                    | +                                       | Isolated in Yamaguchi, Japan           | This study | No PCR amplification        | 3             |
| 3401                    | +                                       | Isolated in Yamaguchi, Japan           | 17         | I                           | 5             |
| 26695                   | +                                       | Isolated in the United Kingdom         | 18         | A                           | 1             |
| SS-1                    | +                                       | Isolated in Australia                  | 19         | I                           | 5             |
| NCTC 11637              | +                                       | Isolated in USA                        | 20         | F                           | 1             |
| PY1                     | +                                       | Hyogo, Japan                           | 21         | A                           | 1             |
| TK1402                  | -                                       | Kanagawa, Japan                        | 22         | K                           | 3             |

<sup>a</sup>, "+" and "-" indicate that phage can and cannot form plaques, respectively.

<sup>b</sup>, RFLP, restriction fragment length polymorphism.

<sup>b</sup>, RFLP types are described in Fig. S1.

TABLE S2. List of *Helicobacter* spp. and phages used in the in silico analysis.

| Organism                                    | Genbank accession No. |
|---------------------------------------------|-----------------------|
| <i>Helicobacter pylori</i> F16              | AP011940              |
| <i>Helicobacter pylori</i> F30              | AP011941              |
| <i>Helicobacter pylori</i> F32              | AP011943              |
| <i>Helicobacter pylori</i> F57              | AP011945              |
| <i>Helicobacter pylori</i> 35A              | CP002096              |
| <i>Helicobacter pylori</i> 51               | CP000012              |
| <i>Helicobacter pylori</i> 83               | CP002605              |
| <i>Helicobacter pylori</i> 52               | CP001680              |
| <i>Helicobacter pylori</i> v225d            | CP001582              |
| <i>Helicobacter pylori</i> Cuz20            | CP002076              |
| <i>Helicobacter pylori</i> PeCan4           | CP002074              |
| <i>Helicobacter pylori</i> Shi470           | CP001072              |
| <i>Helicobacter pylori</i> Sat464           | CP002071              |
| <i>Helicobacter pylori</i> 26695            | AE000511              |
| <i>Helicobacter pylori</i> B8               | FN598874              |
| <i>Helicobacter pylori</i> B38              | FM991728              |
| <i>Helicobacter pylori</i> G27              | CP001173              |
| <i>Helicobacter pylori</i> HPAG1            | CP000241              |
| <i>Helicobacter pylori</i> India7           | CP002331              |
| <i>Helicobacter pylori</i> P12              | CP001217              |
| <i>Helicobacter pylori</i> Lithuania75      | CP002334              |
| <i>Helicobacter pylori</i> SJM180           | CP002073              |
| <i>Helicobacter pylori</i> 2017             | CP002571              |
| <i>Helicobacter pylori</i> 2018             | CP002572              |
| <i>Helicobacter pylori</i> J99              | AE001439              |
| <i>Helicobacter pylori</i> 908              | CP002184              |
| <i>Helicobacter pylori</i> Gambia94/24      | CP002332              |
| <i>Helicobacter pylori</i> SouthAfrica7     | CP002336              |
| <i>Helicobacter felis</i> ATCC 49179        | FQ670179              |
| <i>Helicobacter hepaticus</i> ATCC 51449    | AE017125              |
| <i>Helicobacter bizzozeronii</i> CIII-1     | FR871757              |
| <i>Helicobacter mustelae</i> 12198          | FN555004              |
| <i>Helicobacter acinonychis</i> str. Sheeba | AM260522              |
| <i>Helicobacter</i> phage KHP30             | AB647160              |
| <i>Helicobacter</i> phage KHP40             | AB731695              |
| <i>Helicobacter</i> phage 1961P             | JQ617284              |
| <i>Helicobacter</i> phage phiHP33           | JF734911              |

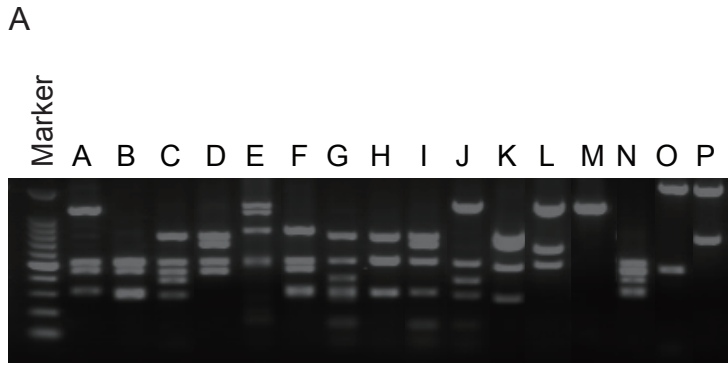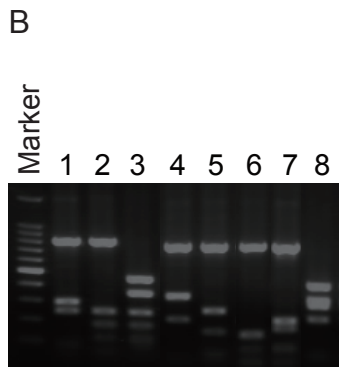

FIG. S1. Restriction fragment length polymorphism analysis of *H. pylori* strains used in this study. Representative restriction patterns of the restriction fragment length polymorphisms are shown. The 100 bp DNA ladder (Takara Bio) was electrophoresed in the leftmost lane of each panel, designated as "Marker". (A) Restriction patterns of UreAB digested by HaeIII. (B) Restriction patterns of FlaA digested by HhaI.

A

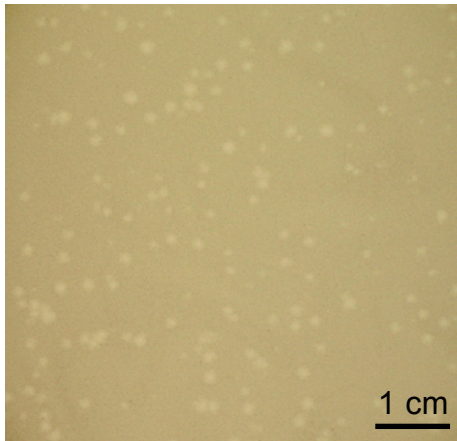

B

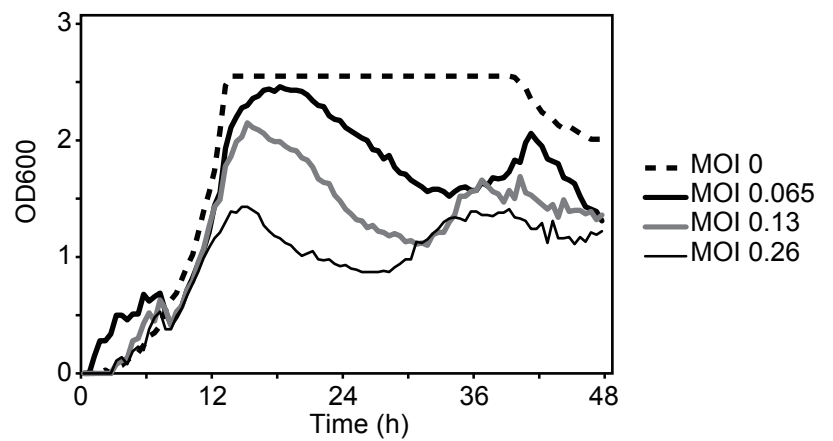

FIG. S2. (A) Photograph of phage plaques. Phage KHP30 was incubated with *H. pylori* strain 3401 for 2 days. (B) Lytic activity of phage KHP30 in liquid medium. *H. pylori* strain 3401 was added to BEV broth at a final concentration of  $3.1 \times 10^7$  bacteria/ml. Phage KHP30 was added to the BEV medium containing *H. pylori* strain 3401 at MOIs of 0.065, 0.13, and 0.26. A no-phage culture was used as the control. The cultures (5 ml) were incubated in glass tubes with shaking, and bacterial growth was measured as the optical density at a wavelength of 600 nm using an automated turbidity meter (OD-Monitor C & T; Titec Co., Saitama, Japan).

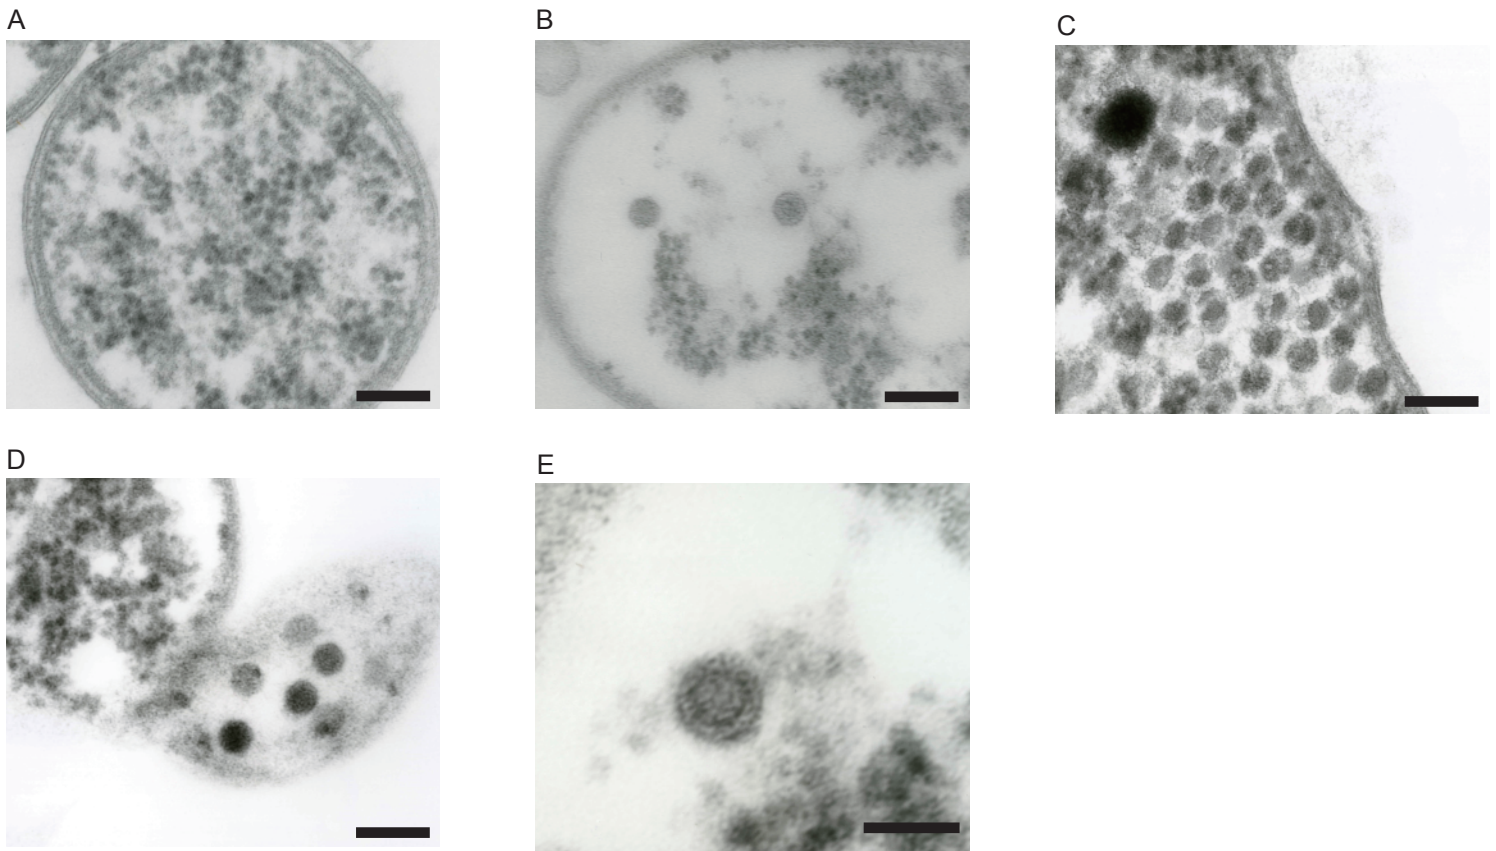

FIG. S3. Electron microscopic observation of thin sections of *H. pylori* and phage-infected *H. pylori*. (A) Thin section of *H. pylori* strain 3401. (B-E) Thin section of *H. pylori* strain 3401 infected with phage KHP30. *H. pylori* was infected with phage, and the thin sections were observed at B 140 min and C, D, E 280 min after phage infection. The observations were made with transmission electron microscopy. Phage particles were seen in B. The phage accumulated inside the cells, which are about to burst in C. Cell burst and phage release are shown in D. The possible layered structure of *H. pylori* phage KHP30 is visible in E. The bars indicate 100 nm in A–D and 50 nm in E.

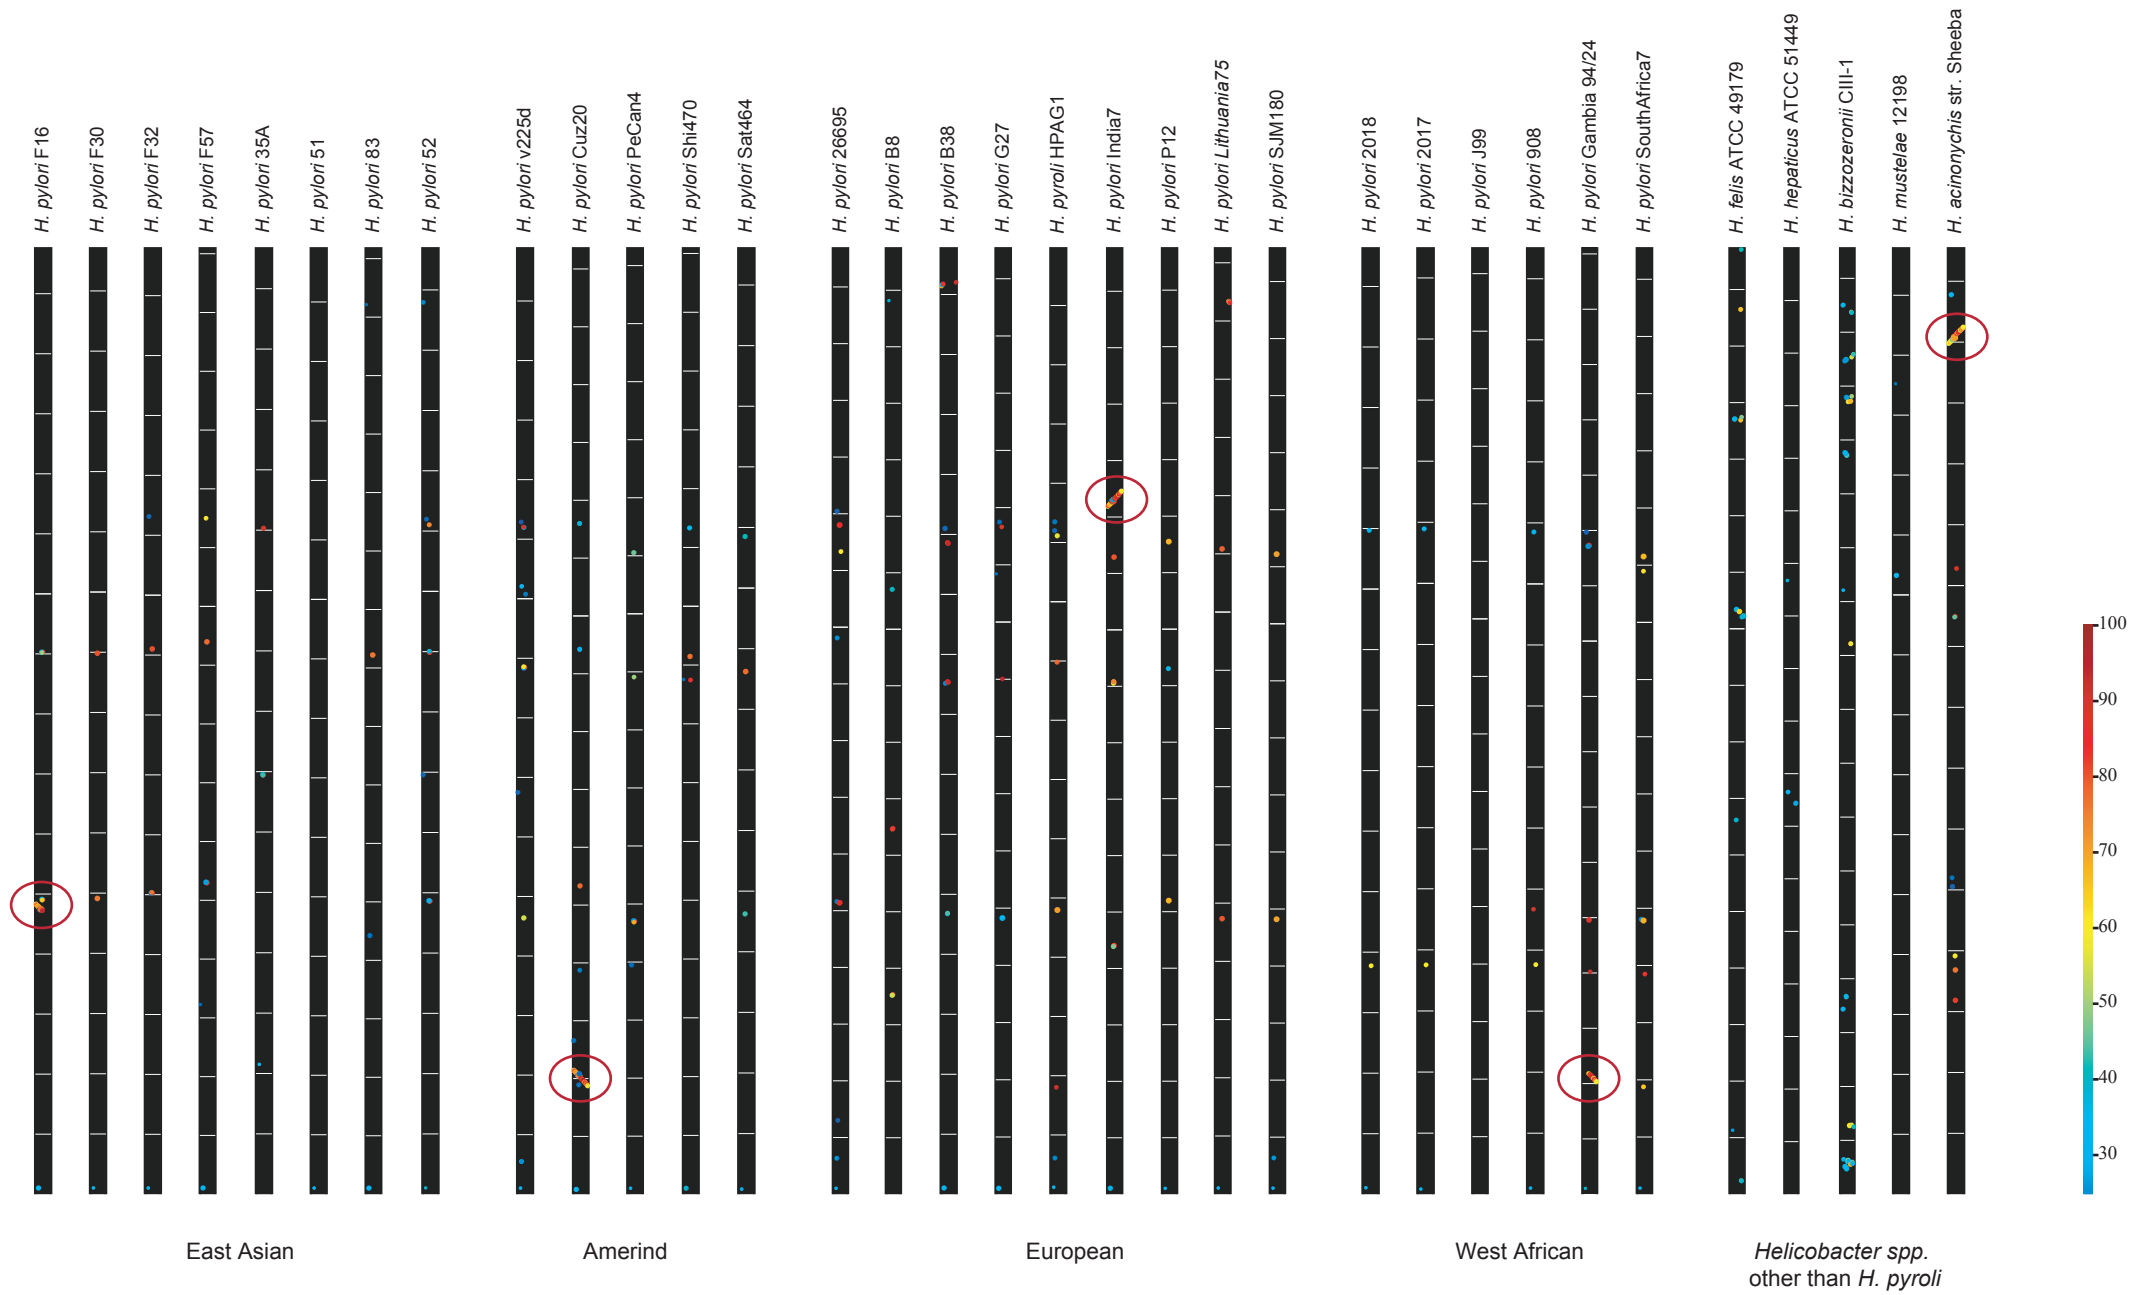

FIG. S4. *In silico* analysis of potential integrated phages in the *H. pylori* genome. *H. pylori* whole genomes were analyzed with BLASTp against using GenomeMatcher, to identify sequences that could be aligned with the KHP30-like phage protein sequences. In each elongated rectangular panel, the vertical and horizontal axes indicate the *H. pylori* genome and the phage genome, respectively. The names of the *H. pylori* strains are listed on the top of the panel. The *H. pylori* strains were grouped into geographical types according to an *in silico* multiple-locus sequence analysis. Red circles, which contain similar ORF alignments to phage KHP30, indicate the possible integration of the phage. The bar on the right indicates the degree of similarity.

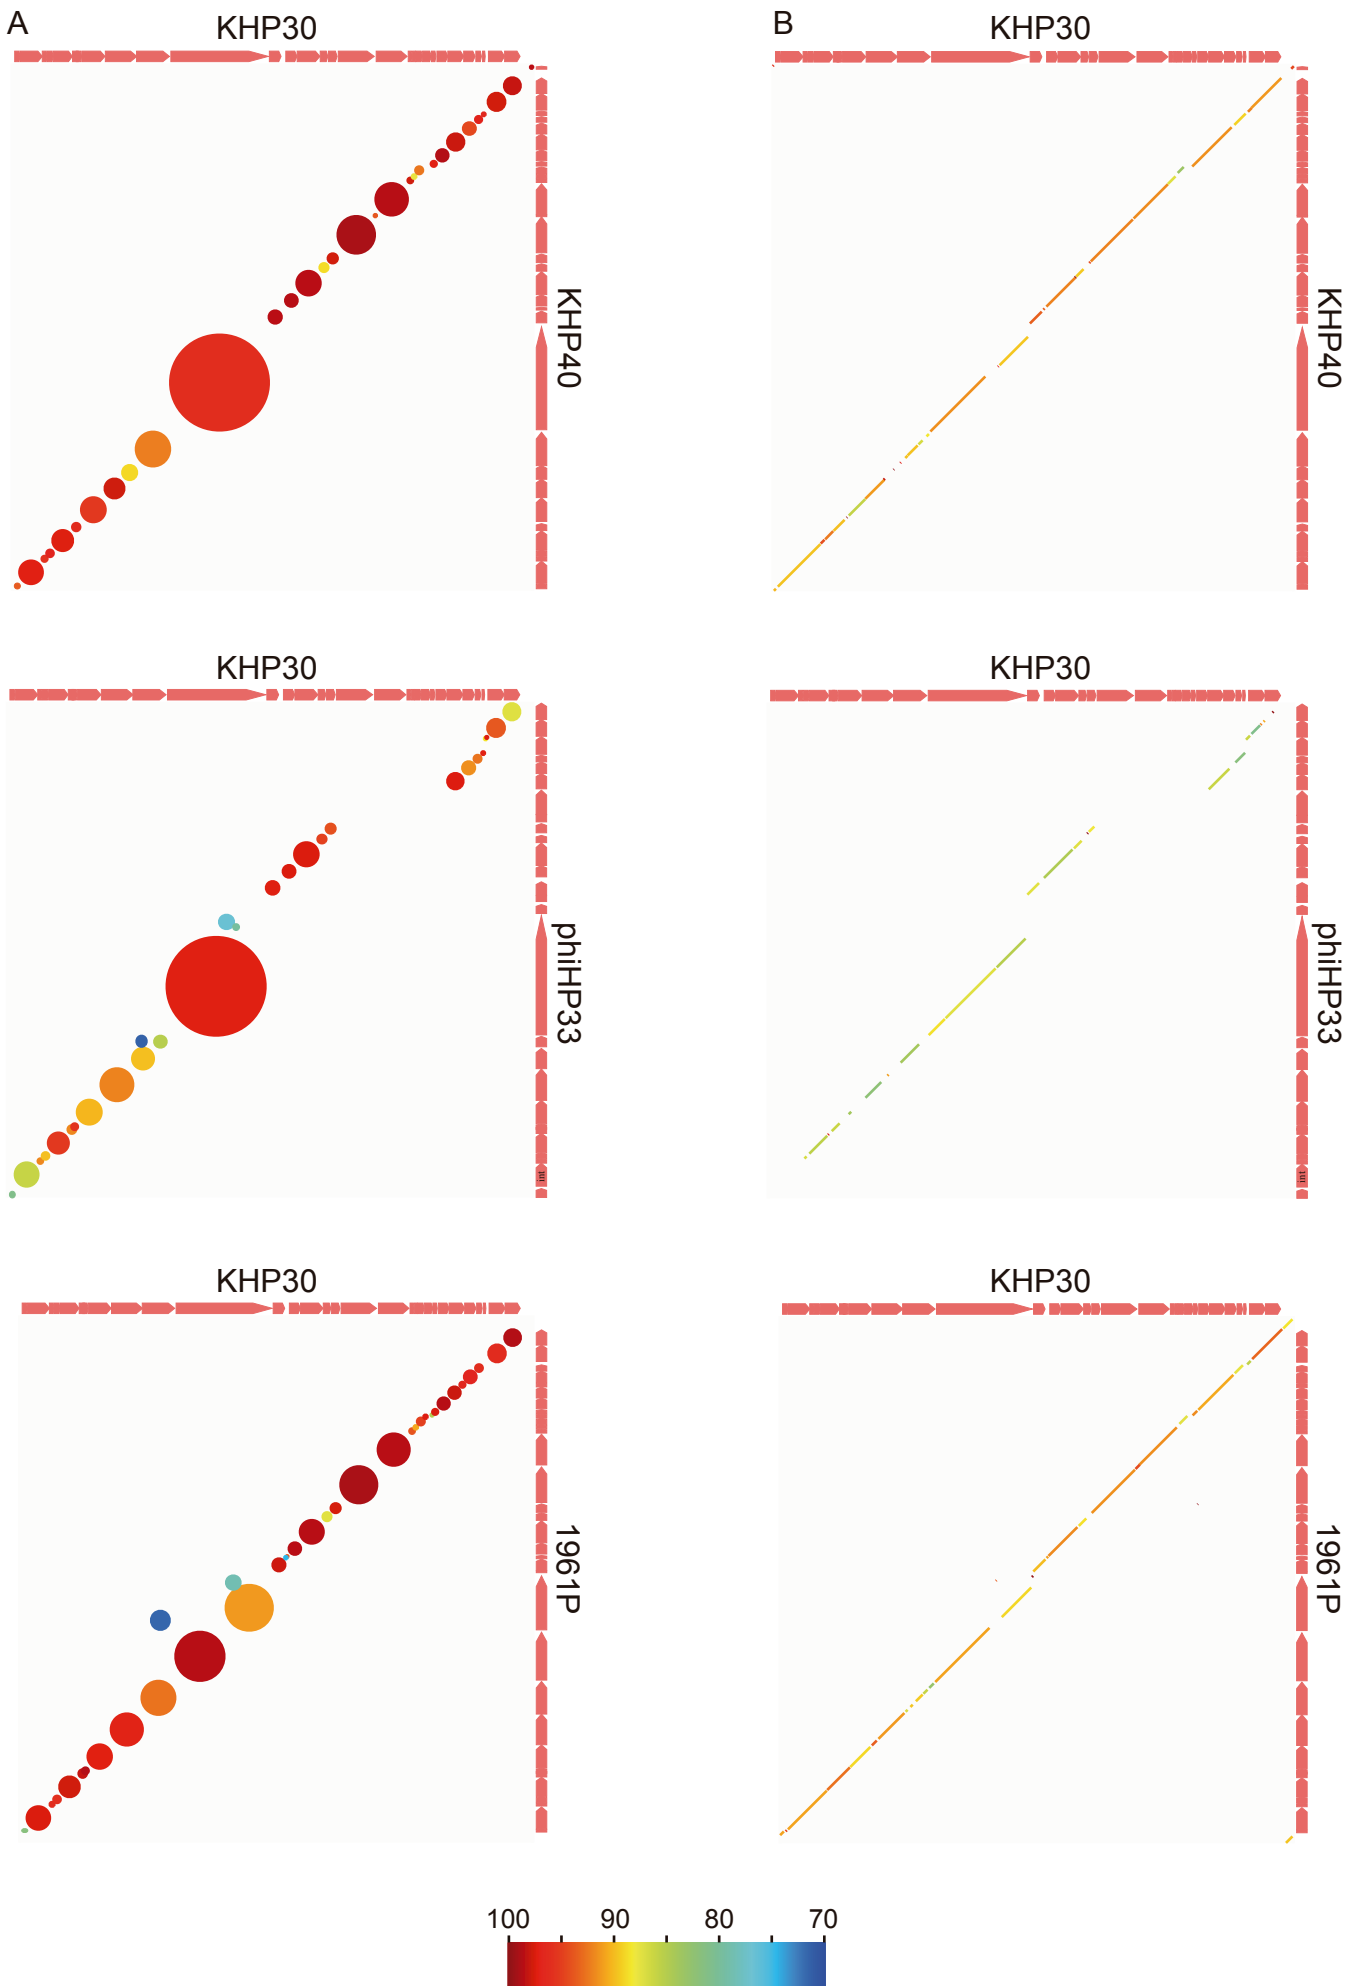



FIG. S5. BLAST analysis of phage KHP30 against the other *H. pylori* phages. *H. pylori* phages  $\phi$ HP33, KHP40, and 1961P were used for this analysis. The analysis was performed with GenomeMatcher. In each panel, the horizontal and vertical axes indicate phage KHP30 and another *H. pylori* phage, respectively. The bar on the bottom indicates the degree of similarity. (A) BLASTp analysis. (B) BLASTn analysis. These phages are highly similar.

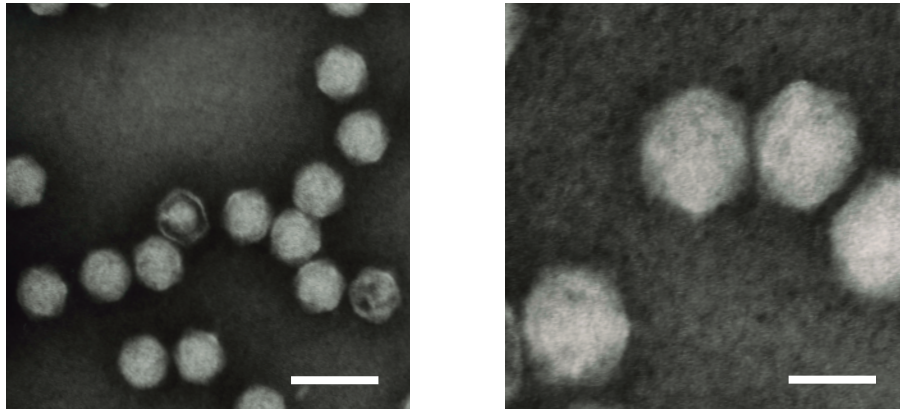

FIG. S6. Morphology of phage KHP40. Phage KHP40 was isolated from *H. pylori* strain KMT83, which was taken from a patient at Kochi University Hospital, Kochi, Japan. The purified phage was observed with transmission electron microscopy. The bars indicate 100 nm (left) and 50 nm (right). Phage KHP40 is a spherical phage with a diameter of  $69.4 \pm 2.3$  nm (mean  $\pm$  SD; n = 11).
